# Supplementary material for: Factors Associated with Fatigued Driving among Australian Truck Drivers: A Cross-Sectional Study
Source: MDPI journal article supplement (doi:10.3390/ijerph20032732), 2023-02-03
Supplement: s1 [file s1]

## Supplementary Material

**Table S1 Measurements of each determinant and collapsed categories**

| <b>Factors</b>           | <b>Determinants</b> | <b>Measurement</b>                                                                                                                                                                                             | <b>Example questions</b>                                                                                                                     | <b>Collapsed categories</b>                                                                                      |
|--------------------------|---------------------|----------------------------------------------------------------------------------------------------------------------------------------------------------------------------------------------------------------|----------------------------------------------------------------------------------------------------------------------------------------------|------------------------------------------------------------------------------------------------------------------|
| Personal factors         | Family situation    | Questions regarding partnership status and dependent children                                                                                                                                                  | Which of the following best describes you?<br>How many dependent children do you have?                                                       | -No partner, no children<br>-No partner with children<br>-Partnered with no children<br>-Partnered with children |
|                          | Education           | Highest level of education                                                                                                                                                                                     | What is the highest level of education and training you have completed?                                                                      | -High school or lower<br>-Above high school                                                                      |
|                          | Financial stress    | Capacity to raise \$2000 within 2 days as individual or household (scale of 1 to 10 where 1 is not at all stressed and 10 is as stressed can be) <sup>41</sup>                                                 | What do you feel is the level of your financial stress today?                                                                                | -High (score of 6 to 10)<br>-Low (score of 1 to 5)                                                               |
| Occupational factors     | Work task*          | 9 items adapted from an Occupational Health & Safety (OHS) vulnerability measurement using a 5-point Likert scale (No risk=Never, Less than once a month or monthly; Yes to risk=Weekly or Daily/Almost daily) | In the last 12 months, how often in your job did you manually lift, carry or push items heavier than 20 kg at least 10 times during the day? | Low-risk group (1-4 risk items)<br>High-risk group (5-9 risk items)                                              |
|                          | Time and schedule*  | Five questions designed to measure scheduling, timing and delays                                                                                                                                               | In the last 12 months, in your experience, how often did you arrive on time but were forced to wait to enter a dock?                         | -Low-risk group (1-2 risk items)<br>-High-risk group (3-5 risk items)                                            |
|                          | Paid for delays*    | One question designed to payment for delays                                                                                                                                                                    | Thinking about the last 12 months, in your experience, you were paid for delays or waiting time.                                             | Binary (No/Yes)                                                                                                  |
| Work environment factors | Work environment*   | 7 items adapted from the OHS Vulnerability Scale                                                                                                                                                               | In the last 12 months, how often in your job did you experience discomfort by mechanical vibration or shock in your work?                    | -Low risk group (1-4 risk)<br>-High-risk group (5-7 risk)                                                        |
|                          | Workplace violence  | Four items about drivers' experience of workplace violence                                                                                                                                                     | In the last 12 months, have you been verbally abused in workplace?                                                                           | Binary (No/Yes)                                                                                                  |

|                     |                                |                                                                                                                                                                                                                                                                                                 |                                                                                          |                                                                                                                                                                                                                                                                         |
|---------------------|--------------------------------|-------------------------------------------------------------------------------------------------------------------------------------------------------------------------------------------------------------------------------------------------------------------------------------------------|------------------------------------------------------------------------------------------|-------------------------------------------------------------------------------------------------------------------------------------------------------------------------------------------------------------------------------------------------------------------------|
| Regulation factors  | OHS training                   | 9 types of OHS training                                                                                                                                                                                                                                                                         |                                                                                          | <ul style="list-style-type: none"> <li>- “Fair” group (had &lt; 5 OHS trainings)</li> <li>- “Good” group (had 5-7 types OHS trainings)</li> </ul>                                                                                                                       |
|                     | Breaking regulation behaviour* | Four items to examine participants’ breaking regulation behaviour                                                                                                                                                                                                                               | In the last 12 months, how often in your job did you drive in excess of the speed limit? | Binary (No/Yes to any of listed situations)                                                                                                                                                                                                                             |
| Lifestyle factors   | Diet                           | National Health Survey (NHS) Module 13-Dietary behaviour                                                                                                                                                                                                                                        | How many serves of fruit do you usually eat each day?                                    | <ul style="list-style-type: none"> <li>-Not meet the guideline</li> <li>- Meet the guideline (had <math>\geq 5</math> serves of vegetables per day or had <math>\geq 2</math> serves of fruit per day)</li> </ul>                                                       |
|                     | Alcohol                        | Three AUDIT-C 3 screening questions (scored on a scale of 0-12)                                                                                                                                                                                                                                 | How often do you have a drink containing alcohol?                                        | <ul style="list-style-type: none"> <li>-Low-risk alcohol use (score of 0-3)</li> <li>-High-risk alcohol use score of 4 or greater)</li> </ul>                                                                                                                           |
|                     | Smoking                        | Current behaviours related to smoking                                                                                                                                                                                                                                                           | How many cigarettes a day do you currently smoke?                                        | <ul style="list-style-type: none"> <li>-Not a smoker</li> <li>- Smoker</li> </ul>                                                                                                                                                                                       |
|                     | Physical activity              | Duration of moderate or vigorous exercise in the past week                                                                                                                                                                                                                                      | How many hours or minutes of moderate exercise did you do?                               | <ul style="list-style-type: none"> <li>-Not meet the guideline</li> <li>- Meet the guideline (<math>\geq 150</math> minutes of moderate-intensity aerobic physical activity or <math>\geq 75</math> minutes of vigorous-intensity aerobic physical activity)</li> </ul> |
| Health risk factors | Sleep                          | Five items using select questions from the sleep disorders screening questionnaire (1 point was allocated for responses of a sleep duration of less than 6 hours, four nights or more per week having problems with sleep, and a “yes” response to nodding off or falling asleep while driving) | In the past month, on average how many hours of sleep do you get in a 24-hour period?    | <ul style="list-style-type: none"> <li>-Low-risk of poor sleep (score of 0-1)</li> <li>-High-risk of poor sleep (score of 2 or greater)</li> </ul>                                                                                                                      |

|  |                |                                                                                                                                             |                                                           |                                                                             |
|--|----------------|---------------------------------------------------------------------------------------------------------------------------------------------|-----------------------------------------------------------|-----------------------------------------------------------------------------|
|  | Fatigue        | 4 items drawn from previous surveys measured (No risk=Never and Less than once a month; Yes to risk=Monthly, Weekly and Daily/Almost daily) | How often do you become fatigued while driving for work?" | -Low-risk group (0-1 risk)<br>-High-risk group (2-4 risk)                   |
|  | Medication use | Whether the participant took any medication to help sleep or combat fatigue                                                                 | Do you currently take any medication to manage pain?      | -No<br>-Yes (took any medication)                                           |
|  | Loneliness     | One question measured by a 5-point Likert scale (0=Never, 1=Rarely, 2=Sometimes, 3=Very often, 4=Always).                                   | During the past week, how often have you felt lonely?"    | -No (never or rarely feel lonely)<br>-Yes (sometimes or always feel lonely) |

\*Measured by 5-point Likert scale ((0=Never, 1= Less than once a month, 2=Monthly, 3=Weekly, 4=Daily/Almost daily). All 5-point Likert scale responses were converted to dichotomous scales, referring to “Yes” (response of 3 or 4) and “No” (response of 0, 1 or 2).

**Table S2: Univariate regression on high risk of fatigued driving**

| High-risk fatigue                     | Odds ratio | 95% confidence interval | p-value |
|---------------------------------------|------------|-------------------------|---------|
| <b>Personal factors</b>               |            |                         |         |
| <b>Age</b>                            |            |                         |         |
| < 35 years                            | Ref        |                         |         |
| 35-44 years                           | 0.595      | 0.283-1.250             | 0.170   |
| 45-54 years                           | 0.521      | 0.258-1.053             | 0.069   |
| > 55 years                            | 0.470      | 0.241-0.914             | 0.026   |
| <b>Family status</b>                  |            |                         |         |
| No partner with no dependent children | Ref        |                         |         |
| No partner with dependent children    | 0.275      | 0.099-0.757             | 0.012   |
| Partnered with no dependent children  | 0.313      | 0.144-0.682             | 0.003   |
| Partnered with dependent children     | 0.359      | 0.166-0.780             | 0.010   |
| <b>Education level</b>                |            |                         |         |
| Above high school                     | Ref        |                         |         |
| High school and lower                 | 1.165      | 0.732-1.856             | 0.519   |
| <b>Financial stress</b>               |            |                         |         |
| Low                                   | Ref        |                         |         |
| High                                  | 1.283      | 0.770-2.136             | 0.338   |
| <b>Mental health condition</b>        |            |                         |         |
| No                                    | Ref        |                         |         |
| Yes                                   | 1.507      | 0.869-2.615             | 0.144   |
| <b>Physical health condition</b>      |            |                         |         |
| No                                    | Ref        |                         |         |
| Yes                                   | 0.866      | 0.515-1.457             | 0.589   |
| <b>Occupational factors</b>           |            |                         |         |
| <b>Working hours</b>                  |            |                         |         |
| < 41 hours                            | Ref        |                         |         |
| 41-60 hours                           | 2.419      | 1.189-4.920             | 0.015   |
| > 60 hours                            | 3.059      | 1.455-6.431             | 0.003   |
| <b>Payment type</b>                   |            |                         |         |
| Flat rate                             | Ref        |                         |         |
| Per trip/delivery                     | 0.789      | 0.377-1.689             | 0.556   |
| Single time pay                       | 0.884      | 0.497-1.574             | 0.676   |
| Kilometre rate                        | 1.676      | 0.866-3.245             | 0.125   |
| Other                                 | 2.346      | 0.921-5.977             | 0.074   |
| <b>Shift type</b>                     |            |                         |         |
| Multiple trips between same location  | Ref        |                         |         |
| Single long trip between 2 locations  | 1.472      | 0.860-2.520             | 0.158   |
| Multiple trips between 2 locations    | 1.185      | 0.668-2.101             | 0.562   |
| <b>Employment type</b>                |            |                         |         |
| Owner driver                          | Ref        |                         |         |
| Not owner driver                      | 1.121      | 0.606-2.076             | 0.714   |
| <b>Driving experience</b>             |            |                         |         |
| < 5 years                             | Ref        |                         |         |
| 5-20 years                            | 1.370      | 0.655-2.884             | 0.406   |
| > 20 years                            | 0.570      | 0.286-1.135             | 0.110   |
| <b>Work task</b>                      |            |                         |         |
| Low risk                              | Ref        |                         |         |
| Moderate risk                         | 2.402      | 1.439-4.009             | 0.001   |
| High risk                             | 4.067      | 0.614-3.456             | <0.001  |
| <b>Work time and schedule</b>         |            |                         |         |
| Low risk                              | Ref        |                         |         |
| High risk                             | 1.907      | 1.205-3.019             | 0.006   |
| <b>Environmental factors</b>          |            |                         |         |
| <b>Work environment</b>               |            |                         |         |
| Low-risk                              | Ref        |                         |         |
| High-risk                             | 2.732      | 1.632-4.575             | <0.001  |
| <b>Workplace violence</b>             |            |                         |         |

|                                          |        |              |        |
|------------------------------------------|--------|--------------|--------|
| No                                       | Ref    |              |        |
| Yes                                      | 0.746  | 1.193-2.990  | 0.007  |
| <b>Regulatory factors</b>                |        |              |        |
| <b>Breaking rules regulation</b>         |        |              |        |
| No                                       | Ref    |              |        |
| Yes                                      | 2.976  | 1.8667-4.746 | <0.001 |
| <b>Fatigue management</b>                |        |              |        |
| No fatigue management                    | Ref    |              |        |
| Basic/advanced fatigue management        | 0.981  | 0.620-1.552  | 0.935  |
| <b>Lifestyle factors and health risk</b> |        |              |        |
| <b>Diet</b>                              |        |              |        |
| Not meet the guideline                   | Ref    |              |        |
| Meet the guideline                       | 0.655  | 0.408-1.0523 | 0.080  |
| <b>Exercise</b>                          |        |              |        |
| Not meet the guideline                   | Ref    |              |        |
| Meet the guideline                       | 0.661  | 0.421-1.037  | 0.072  |
| <b>Smoking</b>                           |        |              |        |
| Non-smokers                              | Ref    |              |        |
| Smokers                                  | 2.234  | 1.243-4.015  | 0.007  |
| <b>Drinking</b>                          |        |              |        |
| Light drinker                            | Ref    |              |        |
| Heavy drinker                            | 0.916  | 0.583-1.439  | 0.704  |
| <b>Sleep</b>                             |        |              |        |
| Low-risk                                 | Ref    |              |        |
| High-risk                                | 10.818 | 3.811-30.710 | <0.001 |
| <b>Pain</b>                              |        |              |        |
| No                                       | Ref    |              |        |
| Yes                                      | 2.344  | 1.466-3.749  | <0.001 |
| <b>Loneliness</b>                        |        |              |        |
| No                                       | Ref    |              |        |
| Yes                                      | 3.638  | 2.202-6.008  | <0.001 |
| <b>BMI (Body mass index)</b>             |        |              |        |
| Under or normal weight (BMI<25)          | Ref    |              |        |
| Overweight (BMI25-29)                    | 0.624  | 0.314-1.239  | 0.178  |
| Obese (BMI>29)                           | 1.154  | 0.621-2.145  | 0.650  |

**Table S3: Univariate regression on having used something to combat fatigue**

| High-risk fatigue                     | Odds ratio | 95% confidence interval | p-value |
|---------------------------------------|------------|-------------------------|---------|
| <b>Personal factors</b>               |            |                         |         |
| <b>Age</b>                            |            |                         |         |
| < 35 years                            | Ref        |                         |         |
| 35-44 years                           | 0.891      | 0.447-1.775             | 0.743   |
| 45-54 years                           | 0.352      | 0.178-0.713             | 0.004   |
| > 55 years                            | 0.233      | 0.115-0.469             | <0.001  |
| <b>Family status</b>                  |            |                         |         |
| No partner with no dependent children | Ref        |                         |         |
| No partner with dependent children    | 1.2        | 0.472-3.054             | 0.702   |
| Partnered with no dependent children  | 0.327      | 0.156-0.682             | 0.003   |
| Partnered with dependent children     | 0.661      | 0.337-1.297             | 0.229   |
| <b>Education level</b>                |            |                         |         |
| Above high school                     | Ref        |                         |         |
| High school and lower                 | 0.667      | 0.399-1.115             | 0.123   |
| <b>Financial stress</b>               |            |                         |         |
| Low                                   | Ref        |                         |         |
| High                                  | 2.241      | 1.340-3.749             | 0.002   |
| <b>Mental health condition</b>        |            |                         |         |
| No                                    | Ref        |                         |         |
| Yes                                   | 1.724      | 0.999-2.974             | 0.050   |
| <b>Physical health condition</b>      |            |                         |         |
| No                                    | Ref        |                         |         |
| Yes                                   | 1.153      | 0.660-2.015             | 0.617   |
| <b>Occupational factors</b>           |            |                         |         |
| <b>Working hours</b>                  |            |                         |         |
| < 41 hours                            | Ref        |                         |         |
| 41-60 hours                           | 0.778      | 0.355-1.699             | 0.528   |
| > 60 hours                            | 1.386      | 0.629-3.053             | 0.419   |
| <b>Payment type</b>                   |            |                         |         |
| Flat rate                             | Ref        |                         |         |
| Per trip/delivery                     | 2.269      | 0.995-5.177             | 0.051   |
| Single time pay                       | 1.609      | 0.822-3.149             | 0.165   |
| Kilometre rate                        | 1.897      | 0.930-3.870             | 0.078   |
| Other                                 | 2.432      | 1.014-5.829             | 0.046   |
| <b>Shift type</b>                     |            |                         |         |
| Multiple trips between same location  | Ref        |                         |         |
| Single long trip between 2 locations  | 1.392      | 0.795-2.438             | 0.247   |
| Multiple trips between 2 locations    | 1.364      | 0.740-2.515             | 0.319   |
| <b>Employment type</b>                |            |                         |         |
| Owner driver                          | Ref        |                         |         |
| Not owner driver                      | 0.943      | 0.489-1.818             | 0.862   |
| <b>Driving experience</b>             |            |                         |         |
| < 5 years                             | Ref        |                         |         |
| 5-20 years                            | 0.917      | 0.453-1.854             | 0.809   |
| > 20 years                            | 0.345      | 0.170-0.702             | 0.003   |
| <b>Work task</b>                      |            |                         |         |
| Low-risk                              | Ref        |                         |         |
| Moderate-risk                         | 2.644      | 1.424-4.907             | 0.002   |
| High-risk                             | 2.836      | 1.401-5.739             | 0.004   |
| <b>Work time and schedule</b>         |            |                         |         |
| Low-risk                              | Ref        |                         |         |
| High-risk                             | 1.799      | 1.069-3.028             | 0.027   |
| <b>Environmental factors</b>          |            |                         |         |
| <b>Work environment</b>               |            |                         |         |
| Low-risk                              | Ref        |                         |         |
| High-risk                             | 5.608      | 2.476-12.701            | <0.001  |
| <b>Workplace violence</b>             |            |                         |         |

|                                          |       |             |        |
|------------------------------------------|-------|-------------|--------|
| No                                       | Ref   |             |        |
| Yes                                      | 2.926 | 1.784-4.797 | <0.001 |
| <b>Regulatory factors</b>                |       |             |        |
| <b>Breaking rules regulation</b>         |       |             |        |
| No                                       | Ref   |             |        |
| Yes                                      | 2.237 | 1.309-3.824 | 0.003  |
| <b>Fatigue management</b>                |       |             |        |
| No fatigue management                    | Ref   |             |        |
| Basic/advanced fatigue management        | 1.186 | 0.721-1.949 | 0.502  |
| <b>Lifestyle factors and health risk</b> |       |             |        |
| <b>Diet</b>                              |       |             |        |
| Not meet the guideline                   | Ref   |             |        |
| Meet the guideline                       | 0.954 | 0.569-1.599 | 0.858  |
| <b>Exercise</b>                          |       |             |        |
| Not meet the guideline                   | Ref   |             |        |
| Meet the guideline                       | 0.699 | 0.430-1.134 | 0.147  |
| <b>Smoking</b>                           |       |             |        |
| Non-smokers                              | Ref   |             |        |
| Smokers                                  | 2.805 | 1.633-4.817 | <0.001 |
| <b>Drinking</b>                          |       |             |        |
| Light drinker                            | Ref   |             |        |
| Heavy drinker                            | 1.610 | 0.979-2.646 | 0.061  |
| <b>Sleep</b>                             |       |             |        |
| Low-risk                                 | Ref   |             |        |
| High-risk                                | 2.691 | 1.499-4.830 | 0.001  |
| <b>Pain</b>                              |       |             |        |
| No                                       | Ref   |             |        |
| Yes                                      | 2.290 | 1.310-4.005 | 0.004  |
| <b>Loneliness</b>                        |       |             |        |
| No                                       | Ref   |             |        |
| Yes                                      | 2.122 | 1.306-3.447 | 0.002  |
| <b>BMI (Body mass index)</b>             |       |             |        |
| Under or normal weight (BMI<25)          | Ref   |             |        |
| Overweight (BMI25-29)                    | 0.693 | 0.339-1.416 | 0.314  |
| Obese (BMI>29)                           | 0.605 | 0.322-1.137 | 0.119  |
